# Supplementary material for: TBX1 Functions as a Tumor Activator in Prostate Cancer by Promoting Ribosome RNA Gene Transcription
Source: Front Oncol. 2021 Jan 26;10:616173. doi: 10.3389/fonc.2020.616173 (PMC7871003; doi:10.3389/fonc.2020.616173)
Supplement: Supplementary file 3 [file DataSheet_2.xls]

## Sheet: CCK-8
						LNCaP
Days	shCtrl			shTBX1			shTBX1+TBX1			shTBX1+Vector
0	0.13	0.12	0.1	0.08	0.1	0.1	0.1	0.15	0.07	0.06	0.12	0.11
1	0.25	0.2	0.21	0.14	0.18	0.18	0.2	0.2	0.18	0.12	0.19	0.24
3	0.55	0.42	0.45	0.26	0.2	0.29	0.35	0.42	0.46	0.18	0.27	0.33
5	0.89	0.76	0.8	0.41	0.37	0.5	0.76	0.7	0.75	0.3	0.37	0.4
7	1.4	1.2	1.6	0.5	0.75	0.8	1.1	1.3	1.5	0.5	0.6	0.7
						DU145
		shCtrl			shTBX1			shTBX1+TBX1			shTBX1+Vector
0	0.07	0.11	0.09	0.07	0.12	0.09	0.13	0.11	0.09	0.07	0.1	0.14
1	0.2	0.18	0.2	0.14	0.17	0.17	0.24	0.18	0.16	0.19	0.16	0.18
3	0.38	0.3	0.3	0.2	0.25	0.22	0.4	0.3	0.27	0.26	0.28	0.25
5	0.55	0.65	0.64	0.38	0.41	0.4	0.55	0.65	0.6	0.34	0.42	0.46
7	1	1.25	1.4	0.5	0.63	0.6	1	1.1	1.16	0.45	0.49	0.52

## Sheet: cell cycle
			LNCaP								DU145
		G0/G1	S	G2/M						G0/G1	S	G2/M
	shCtrl	24.6	39.1	36.1					shCtrl	32	42.4	25.7
	shTBX1	56.2	22.7	21.1					shTBX1	59.4	25.9	14.6
	shTBX1+TBX1	31.8	35.2	33.1					shTBX1+TBX1	32	42.4	25.7
	shTBX1+Vector	50.4	30.4	19.2					shTBX1+Vector	65	23.6	12.6
